# Supplementary material
Source: PubMed Central journal article supplement (PMC3207399)
Supplement: supp_M111.289124_jbc.M111.289124-1.pdf [file supp_M111.289124_jbc.M111.289124-1.pdf]

Table S1. Primers used in this study

| Primer                               | Sequence (5'-3')              |
|--------------------------------------|-------------------------------|
| Primers for mutant construction      |                               |
| sigE-5F                              | CGGAGCTCTGCCTTAAACTCAGTCCGTA  |
| sigE-5R                              | ACGGATCCTTTCCTTGAGGGATTCATGC  |
| sigE-3F                              | TAGGATCCGTTCAACTTATCCCGCGAAC  |
| sigE-3R                              | ATCTCGAGTCACGCTCGACAGCTATTTG  |
| Primers for qRT-PCR                  |                               |
| RTrn16SF2                            | GCAAGTCGAACGGTCTCTTC          |
| RTrn16SR2                            | GGTATTAGCCACCGTTTCCA          |
| RTglgP1-F                            | TTTCGTCGCTTAGACCCAGA          |
| RTglgP2-R                            | ATTGACGGTTAGCACGATCC          |
| RTxfp-F                              | TGCTCTTGTTTCATGCCTTTG         |
| RTxfp-R                              | GGGTTGAGGAACTTGTTGGA          |
| RTgap1-F                             | CCGAAGGGTTAATGACCACA          |
| RTgap1-R                             | GCGGAAAGCCATAACCAGTTA         |
| RTpyk1-F                             | GGCAAATCAGTGCTGACAGA          |
| RTpyk1-R                             | TGGTGGTAAAGTTCCCAAGC          |
| RTtalB-F                             | GACCACCAATCCCTCTCTGA          |
| RTtalB-R                             | AAGCGAGGGAGACAATTTGA          |
| RTsigE-F                             | TGGCACGTTATCCACTGCTA          |
| RTsigE-R                             | GTCGGATGTTGCCCTATTTG          |
| Primers for RACE-PCR                 |                               |
| 1272R                                | GCACGATCCAACCTGTGCCAGGAAGC    |
| Primers for gel mobility shift assay |                               |
| P1272-F                              | CCTTCCCTCGGTACATGAAA          |
| P1272-R                              | AATCGGCTGCATAGGTTAGC          |
| T7promoter                           | TAATACGACTCACTATAGGG          |
| P1272D2-F                            | TTCCTTAATGGCAATTTTACAAACAT    |
| P1272D2-R                            | ATTGCCATTAAGGAATGGAAATCTT     |
| PhetRD-F                             | AATGGCTTGCAAACCTTGATTTTCC     |
| PhetRD-R                             | GGTTTGCAAGCCATTATGACTACTG     |
| PsigE-F                              | ACAGAGCTCAGGTTGAGGGGGTTAACAGA |
| P2806-F                              | TGCTAATAAGGTTTTGCCTGGT        |
| P2806-R                              | CGCTTTGGAAATTACGTGTG          |
